# Supplementary material for: Exome Sequencing Identifies Early Gastric Carcinoma as an Early Stage of Advanced Gastric Cancer
Source: PubMed Central journal article supplement (PMC3871845; doi:10.1371/journal.pone.0082770), 2013-12-23
Supplement: pone.0082770.s001.pdf [file pone.0082770.s001.pdf]

Supplementary Table 1. Summary of whole exome sequencing statistics for four pairs of gastric samples.

| Case No. | Read length | Total PF reads | Total HQ uniquely mapped reads | # reads in targeted regions +/-100bp (min fraction: 0.5) | % reads in targeted regions +/-100bp (min fraction: 0.5) | # bases in targeted regions | % bases in targeted regions | Mean coverage | Median coverage | $\geq 1X$ | $\geq 10X$ | $\geq 30X$ | $\geq 50X$ | $\geq 100X$ |
|----------|-------------|----------------|--------------------------------|----------------------------------------------------------|----------------------------------------------------------|-----------------------------|-----------------------------|---------------|-----------------|-----------|------------|------------|------------|-------------|
| Normal 1 | 65          | 129,997,828    | 119,763,389                    | 85,261,792                                               | 71.2%                                                    | 4,315,720,151               | 53.0%                       | 114.7         | 85              | 98.4%     | 92.2%      | 78.2%      | 66.4%      | 44.0%       |
| Tumor 1  | 65          | 122,585,721    | 111,165,743                    | 75,938,176                                               | 68.3%                                                    | 3,833,073,700               | 50.7%                       | 101.9         | 84              | 98.8%     | 94.3%      | 82.4%      | 69.9%      | 41.7%       |
| Normal 2 | 65          | 161,928,120    | 147,184,937                    | 100,785,607                                              | 68.5%                                                    | 5,083,417,090               | 50.8%                       | 135.1         | 102             | 98.3%     | 91.9%      | 79.5%      | 69.7%      | 50.6%       |
| Tumor 2  | 65          | 156,989,079    | 143,373,596                    | 98,147,306                                               | 68.5%                                                    | 4,985,278,129               | 51.1%                       | 132.5         | 103             | 98.5%     | 92.9%      | 80.9%      | 70.8%      | 50.8%       |
| Normal 3 | 65          | 134,002,492    | 122,308,791                    | 82,945,029                                               | 67.8%                                                    | 4,218,519,377               | 50.7%                       | 112.1         | 92              | 98.6%     | 93.7%      | 81.7%      | 70.4%      | 46.3%       |
| Tumor 3  | 65          | 95,756,622     | 87,306,451                     | 59,928,090                                               | 68.6%                                                    | 3,056,917,957               | 51.5%                       | 81.2          | 68              | 98.6%     | 92.8%      | 77.2%      | 62.2%      | 31.2%       |
| Normal 4 | 65          | 145,845,854    | 129,594,610                    | 91,136,558                                               | 70.3%                                                    | 4,370,516,184               | 51.9%                       | 116.2         | 90              | 98.2%     | 91.5%      | 78.0%      | 67.2%      | 46.2%       |
| Tumor 4  | 65          | 143,731,855    | 128,968,300                    | 90,200,830                                               | 69.9%                                                    | 4,356,431,540               | 52.0%                       | 115.8         | 92              | 98.3%     | 92.1%      | 79.0%      | 68.2%      | 46.5%       |
| Average  |             | 136,354,696    | 123,708,227                    | 85,542,924                                               | 69.1%                                                    | 4,277,484,266               | 51.5%                       | 113.7         | 89.5            | 98.5%     | 92.7%      | 79.6%      | 68.1%      | 44.7%       |
