# Supplementary material for: Exome Sequencing Identifies Early Gastric Carcinoma as an Early Stage of Advanced Gastric Cancer
Source: PubMed Central journal article supplement (PMC3871845; doi:10.1371/journal.pone.0082770), 2013-12-23
Supplement: pone.0082770.s003.pdf [file pone.0082770.s003.pdf]

Supplementary Table 3. Primers for Sanger sequencing, allele frequency and validation results.

| Gene          | Chromosome | Position  | Reference base | Mutant base | Forward                 | Reverse                   | Allele frequency (%)* | Sanger confirmation |
|---------------|------------|-----------|----------------|-------------|-------------------------|---------------------------|-----------------------|---------------------|
| <i>BCORL1</i> | X          | 129171433 | G              | A           | GTCCCCACAGGATGTTGTTC    | GGGAGATGCAGCCCTCTT        | 47                    | Yes                 |
| <i>DYRK3</i>  | 1          | 206821100 | A              | G           | GCAGATGGGGCCTATATTCA    | CAGCTGCTTGACGATGAAAG      | 20                    | Yes                 |
| <i>GPR116</i> | 6          | 46828555  | G              | A           | AGAGCCCCTCTCAGGATGAG    | CAGAGAAGCTGCAATGGGGA      | 10                    | No                  |
| <i>GPR116</i> | 6          | 46826909  | G              | C           | CTCTGGGGCAATGTGGTCAT    | TTGGCAAGCCTGAAGTTCCA      | 29                    | Yes                 |
| <i>LRP2</i>   | 2          | 170094762 | C              | T           | TGAACAGCATCTGAGAGTCTGC  | TTTTGAAACGCACTCCAGGT      | 19                    | Yes                 |
| <i>LRP2</i>   | 2          | 169996110 | C              | T           | GTTTGCATGGTGTGGGCAC     | TTTCCCAGAAGAGGCAAGG       | 17                    | Yes                 |
| <i>LRP12</i>  | 8          | 105503371 | G              | C           | TTGAGGCCCAATAGTTCTGTC   | GTGATGGCAGCGATGAAGA       | 27                    | Yes                 |
| <i>LRP12</i>  | 8          | 105509257 | A              | G           | TTGAGGCCCAATAGTTCTGTC   | GTGATGGCAGCGATGAAGA       | 6                     | No                  |
| <i>MACF1</i>  | 1          | 39806513  | G              | T           | AGTGTTAAATCAGCACACACAGC | ACTGTTAGATCCCTTGCTGTTC    | 22                    | Yes                 |
| <i>MACF1</i>  | 1          | 39550090  | G              | A           | AGTGTTAAATCAGCACACACAGC | ACTGTTAGATCCCTTGCTGTTC    | 16                    | Yes                 |
| <i>MCM10</i>  | 10         | 13217564  | C              | T           | TCAGTGTGGTTGCCTTTTCA    | GGGGTCCCCACAATTTGAC       | 14                    | Yes                 |
| <i>MCM10</i>  | 10         | 13237081  | C              | T           | TTTCTGCAGAGCTCAAGTGAAG  | CTCCAGCCTGGGGAATC         | 20                    | Yes                 |
| <i>PCDH17</i> | 13         | 58208229  | G              | A           | AGTACCTGGGCTCTGTGCTC    | CTCAAAGCCTTGGTCTGCT       | 6                     | No                  |
| <i>PCDH17</i> | 13         | 58208418  | G              | A           | AGTACCTGGGCTCTGTGCTC    | CTCAAAGCCTTGGTCTGCT       | 13                    | No                  |
| <i>PCDH1</i>  | 5          | 140432602 | C              | T           | GACCACCTAGCTTGTCTGCC    | CGTAGAGCTTCCCATTGCCT      | 24                    | Yes                 |
| <i>PCDH1</i>  | 5          | 140431060 | C              | T           | ACCTGTTGCAGAAAAGTGAAAGT | AAACGAGCCGCTCTCCATTT      | 15                    | Yes                 |
| <i>PRKCI</i>  | 3          | 169998081 | C              | T           | CAACAGGCAATGAACACCAG    | TTTTTCACAACCTTTCATTGCATAA | 9                     | Yes                 |
| <i>RDH5</i>   | 12         | 56115041  | C              | G           | GTAGGTCACCTGGGCTCCAG    | GAGGGGGTCAGGCAGCTG        | 17                    | Yes                 |
| <i>TP53</i>   | 17         | 7577538   | C              | T           | TGGCTCTGACTGTACCACCA    | GGGTCAGAGGCAAGCAGA        | 16                    | Yes                 |
| <i>TP53</i>   | 17         | 7577545   | T              | C           | TGGCTCTGACTGTACCACCA    | GGGTCAGAGGCAAGCAGA        | 20                    | Yes                 |
| <i>UNC5C</i>  | 4          | 96163682  | G              | A           | CATCCCTTAAGCAGCTGCCT    | CTGCATGCAAAGCCCATCAG      | 22                    | Yes                 |

\*Allele frequency is the proportion of variant reads present in the exome sequencing data for the tumor.
