# Supplementary material for: Exome Sequencing Identifies Early Gastric Carcinoma as an Early Stage of Advanced Gastric Cancer
Source: PubMed Central journal article supplement (PMC3871845; doi:10.1371/journal.pone.0082770), 2013-12-23
Supplement: pone.0082770.s004.pdf [file pone.0082770.s004.pdf]

Supplementary Table 4. Comparison of somatic point mutation spectra in gastric cancers by tumor stage and histologic type.

| Base pair change | Early cancer | Advanced cancer | Intestinal / Mixed | Diffuse-type |
|------------------|--------------|-----------------|--------------------|--------------|
| <b>MSS</b>       |              |                 |                    |              |
| A>C              | 11 (4.3%)    | 75 (4.3%)       | 80 (4.3%)          | 6 (4.1%)     |
| T>G              | 8 (3.2%)     | 67 (3.8%)       | 67 (3.6%)          | 8 (5.4%)     |
| A>G              | 22 (8.7%)    | 111 (6.4%)      | 125 (6.8%)         | 8 (5.4%)     |
| T>C              | 18 (7.1%)    | 109 (6.3%)      | 116 (6.3%)         | 11 (7.4%)    |
| A>T              | 13 (5.1%)    | 59 (3.4%)       | 66 (3.6%)          | 6 (4.1%)     |
| T>A              | 9 (3.6%)     | 78 (4.5%)       | 84 (4.6%)          | 3 (2.0%)     |
| C>T              | 64 (25.3%)   | 416 (23.9%)     | 431 (23.3%)        | 49 (33.1%)   |
| G>A              | 60 (23.7%)   | 415 (23.8%)     | 437 (23.7%)        | 38 (25.7%)   |
| C>G*             | 6 (2.4%)     | 80 (4.6%)       | 85 (4.6%)          | 1 (0.7%)     |
| G>C              | 4 (1.6%)     | 70 (4.0%)       | 72 (3.9%)          | 2 (1.4%)     |
| C>A              | 14 (5.5%)    | 125 (7.2%)      | 132 (7.2%)         | 7 (4.7%)     |
| G>T              | 24 (9.5%)    | 136 (7.8%)      | 151 (8.2%)         | 9 (6.1%)     |
| <b>MSI-high</b>  |              |                 |                    |              |
| A>C              | 27 (2.0%)    | 62 (2.1%)       | 62 (2.1%)          | 27 (2.0%)    |
| T>G              | 23 (1.7%)    | 59 (2.0%)       | 59 (2.0%)          | 23 (1.7%)    |
| A>G              | 95 (7.1%)    | 428 (14.4%)     | 428 (14.4%)        | 95 (7.1%)    |
| T>C              | 118 (8.8%)   | 448 (15.1%)     | 448 (15.1%)        | 118 (8.8%)   |
| A>T              | 32 (2.4%)    | 58 (2.0%)       | 58 (2.0%)          | 32 (2.4%)    |
| T>A              | 19 (1.4%)    | 50 (1.7%)       | 50 (1.7%)          | 19 (1.4%)    |
| C>T              | 422 (31.5%)  | 751 (25.3%)     | 751 (25.3%)        | 422 (31.5%)  |
| G>A              | 432 (32.3%)  | 811 (27.3%)     | 811 (27.3%)        | 432 (32.3%)  |
| C>G              | 16 (1.2%)    | 15 (0.5%)       | 15 (0.5%)          | 16 (1.2%)    |
| G>C              | 9 (0.7%)     | 16 (0.5%)       | 16 (0.5%)          | 9 (0.7%)     |
| C>A              | 74 (5.5%)    | 157 (5.3%)      | 157 (5.3%)         | 74 (5.5%)    |
| G>T              | 71 (5.3%)    | 114 (3.8%)      | 114 (3.8%)         | 71 (5.3%)    |

\**P* value of 0.010 between intestinal/mixed and diffuse-type carcinomas by Wilcoxon rank sum test (Data from this and a previous study by Wang *et al.* )
